# Supplementary material
Source: publisher figshare collection journal article supplement (https://sage.figshare.com/ndownloader/files/17636495)
Supplement: Supplementary file 1 [file 17636495]

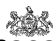**§303.16. Basic Sentencing Matrix.****7th Edition (12/28/2012)**

| Level                                                     | OGS    | Example Offenses                                                                                                                                                                  | Prior Record Score |             |             |             |             |             |             |       |         |
|-----------------------------------------------------------|--------|-----------------------------------------------------------------------------------------------------------------------------------------------------------------------------------|--------------------|-------------|-------------|-------------|-------------|-------------|-------------|-------|---------|
|                                                           |        |                                                                                                                                                                                   | 0                  | 1           | 2           | 3           | 4           | 5           | RFEL        | REVOC | AGG/MIT |
| <b>LEVEL 5</b><br>State<br>Incar                          | 14     | Murder 3<br>Inchoate Murder (SBI)<br>Rape (victim <13 yrs)                                                                                                                        | 72-SL              | 84-SL       | 96-SL       | 120-SL      | 168-SL      | 192-SL      | 204-SL      | SL    | ~/-12   |
|                                                           | 13     | Inchoate Murder (No SBI)<br>Weapons Mass Destr-Use<br>PWID Cocaine (>1,000 g)                                                                                                     | 60-78              | 66-84       | 72-90       | 78-96       | 84-102      | 96-114      | 108-126     | 240   | +/- 12  |
|                                                           | 12     | Rape-Forcible Compulsion<br>IDSI-Forceible Compulsion<br>Robbery-Inflces SBI                                                                                                      | 48-66              | 54-72       | 60-78       | 66-84       | 72-90       | 84-102      | 96-114      | 120   | +/- 12  |
|                                                           | 11     | Agg Assault-Cause SBI<br>Voluntary Manslaughter<br>Sexual Assault<br>PWID Cocaine (100-1,000 g)                                                                                   | 36-54<br>BC        | 42-60       | 48-66       | 54-72       | 60-78       | 72-90       | 84-102      | 120   | +/- 12  |
|                                                           | 10     | Kidnapping<br>Agg Indecent Assault F2<br>Person-Person in Building<br>Hom by Vehicle-DUI & Work Zone<br>PWID Cocaine(50-<100 g)                                                   | 22-36<br>BC        | 30-42<br>BC | 36-48<br>BC | 42-54       | 48-60       | 60-72       | 72-84       | 120   | +/- 12  |
|                                                           | 9      | Sexual Exploitation of Children<br>Robbery-Commit/Threat F1/F2<br>Burglary-Home/Person Present<br>Arson-No Person in Building                                                     | 12-24<br>BC        | 18-30<br>BC | 24-36<br>BC | 30-42<br>BC | 36-48<br>BC | 48-60       | 60-72       | 120   | +/- 12  |
| <b>LEVEL 4</b><br>State<br>Incar/<br>RIP<br>trade         | 8 (F1) | Agg Assault -Cause BI w/DW<br>Theft (Firearm)<br>Identity theft (3rd/+ & Vic>=60 yrs)<br>Hom by Veh-DUI or Work Zone<br>Theft (>\$100,000)<br>PWID Cocaine (10-<50 g)             | 9-16<br>BC         | 12-18<br>BC | 15-21<br>BC | 18-24<br>BC | 21-27<br>BC | 27-33<br>BC | 40-52       | NA    | +/- 9   |
|                                                           | 7 (F2) | Robbery-Inflcts/Threatens BI<br>Burglary-Home/No Person Present<br>Statutory Sexual Assault<br>Theft (>\$50,000-\$100,000)<br>Identity Theft (3rd/subq)<br>PWID Cocaine (5-<10 g) | 6-14<br>BC         | 9-16<br>BC  | 12-18<br>BC | 15-21<br>BC | 18-24<br>BC | 24-30<br>BC | 35-45<br>BC | NA    | +/- 6   |
| <b>LEVEL 3</b><br>State/<br>Cnty<br>Incar<br>RIP<br>trade | 6      | Agg Assault-Cause Fear of SBI<br>Homicide by Vehicle<br>Burglary-Not a Home/Person Prsnt<br>Theft (>\$25,000-\$50,000)<br>Arson-Endanger Property<br>PWID Cocaine (2<5 g)         | 3-12<br>BC         | 6-14<br>BC  | 9-16<br>BC  | 12-18<br>BC | 15-21<br>BC | 21-27<br>BC | 27-40<br>BC | NA    | +/- 6   |
|                                                           | 5 (F3) | Burglary F2<br>Theft (>\$2000-\$25,000)<br>Bribery<br>PWID Marij (1-<10 lbs)                                                                                                      | RS-9               | 1-12<br>BC  | 3-14<br>BC  | 6-16<br>BC  | 9-16<br>BC  | 12-18<br>BC | 24-36<br>BC | NA    | +/- 3   |
| <b>LEVEL 2</b><br>Cnty<br>Incar<br>RIP<br>RS              | 4      | Indecent Assault M2<br>Forgery (Money, Stocks)<br>Weapon on School Property<br>Crim Trespass F2                                                                                   | RS-3               | RS-9        | RS-<12      | 3-14<br>BC  | 6-16<br>BC  | 9-16<br>BC  | 21-30<br>BC | NA    | +/- 3   |
|                                                           | 3 (M1) | Simple Assault-Attempt/Cause BI<br>Theft (\$200-\$2000)<br>Carrying Explosives<br>Simple Possession                                                                               | RS-1               | RS-6        | RS-9        | RS-<12      | 3-14<br>BC  | 6-16<br>BC  | 12-18<br>BC | NA    | +/- 3   |
| <b>LEVEL 1</b><br>RS                                      | 2 (M2) | Theft (\$50-<\$200)<br>Retail Theft (1st/2nd Offense)<br>Bad Checks (\$500-<\$1,000)                                                                                              | RS                 | RS-2        | RS-3        | RS-4        | RS-6        | 1-9         | 6- <12      | NA    | +/- 3   |
|                                                           | 1 (M3) | Most Misd. 3's;Theft (<\$50)<br>DUI (M)<br>Poss Small Amount Marij                                                                                                                | RS                 | RS-1        | RS-2        | RS-3        | RS-4        | RS-6        | 3-6         | NA    | +/- 3   |

1. Designated areas of the matrix indicate restrictive intermediate punishments may be imposed as a substitute for incarceration.

2. When restrictive intermediate punishments are appropriate, the duration of the restrictive intermediate punishment programs are recommended not to exceed the guideline ranges.

3. When the range is RS through a number of months (e.g. RS-6), RIP may be appropriate.

4. All numbers in sentence recommendations suggest months of minimum confinement pursuant to 42 Pa.C.S. 9755(b) and 9756(b).

5. Statutory classification (e.g., F1, F2, etc.) in brackets reflect the omnibus OGS assignment for the given grade.

Key:

BC = boot camp

CNTY = county

INCAR = incarceration

PWID = possession with intent to deliver

REVOC = repeat violent offender category

RFEL = repeat felony 1 and felony 2 offender category

RIP = restrictive intermediate punishments

RS = restorative sanctions

SBI = serious bodily injury

SL = statutory limit (longest minimum sentence)

~ = no recommendation (aggravated sentence would exceed statutory limit)

&lt; ; &gt; = less than; greater than

**Author's Note on Guideline Levels:** Level 1 offenders have the least serious offenses and minimal criminal histories. The presumptive sentence is Restorative Sanctions (RS), which are alternative sanctions designed to provide sufficient control of the offender to fulfill court obligations and some degree of rehabilitation. Level 2 offenders are generally non-violent, with several less serious prior convictions. The standard range requires county jail but permits RS and county intermediate punishments (CIP). The purpose is to control the offender, offer restitution to victims, and treat drug dependent offenders. Level 3 offenders are convicted of serious offenses and have numerous priors. The standard sentence requires incarceration in a state or county facility but allows for CIP. The purpose is retribution and control, and drug treatment where appropriate. Level 4 is for very serious offenders with numerous priors. The standard range requires state incarceration but allows for county jail or CIP. Retribution and incapacitation are the primary goals, but treatment is available for non-violent substance dependent offenders. Level 5 is for offenders that are the most violent or who have major drug convictions. The standard sentence is state imprisonment with the goal being “just deserts” and incapacitation to protect the public. However, State IP, a treatment based program, is available for eligible offenders’ who are drug dependent. For more information see *Sentencing Guideline Implementation Manual, 7th Edition* (PCS 2012).
